# Supplementary material for: A new class of functionalized calix[4]arenes as neutral receptors for colorimetric detection of fluoride ions
Source: Royal Society of Chemistry journal article supplement (doi:10.1039/b800502h), 2008-01-01
Supplement: b800502h.pdf [file b800502h.pdf]

# A new class of functionalized calix[4]arenes as neutral receptors for colorimetric detection of fluoride ions

Har Mohindra Chawla,\* Rahul Shrivastava and Satya Narayan Sahu

Department of Chemistry, Indian Institute of Technology, Hauz Khas, New Delhi-110016, India

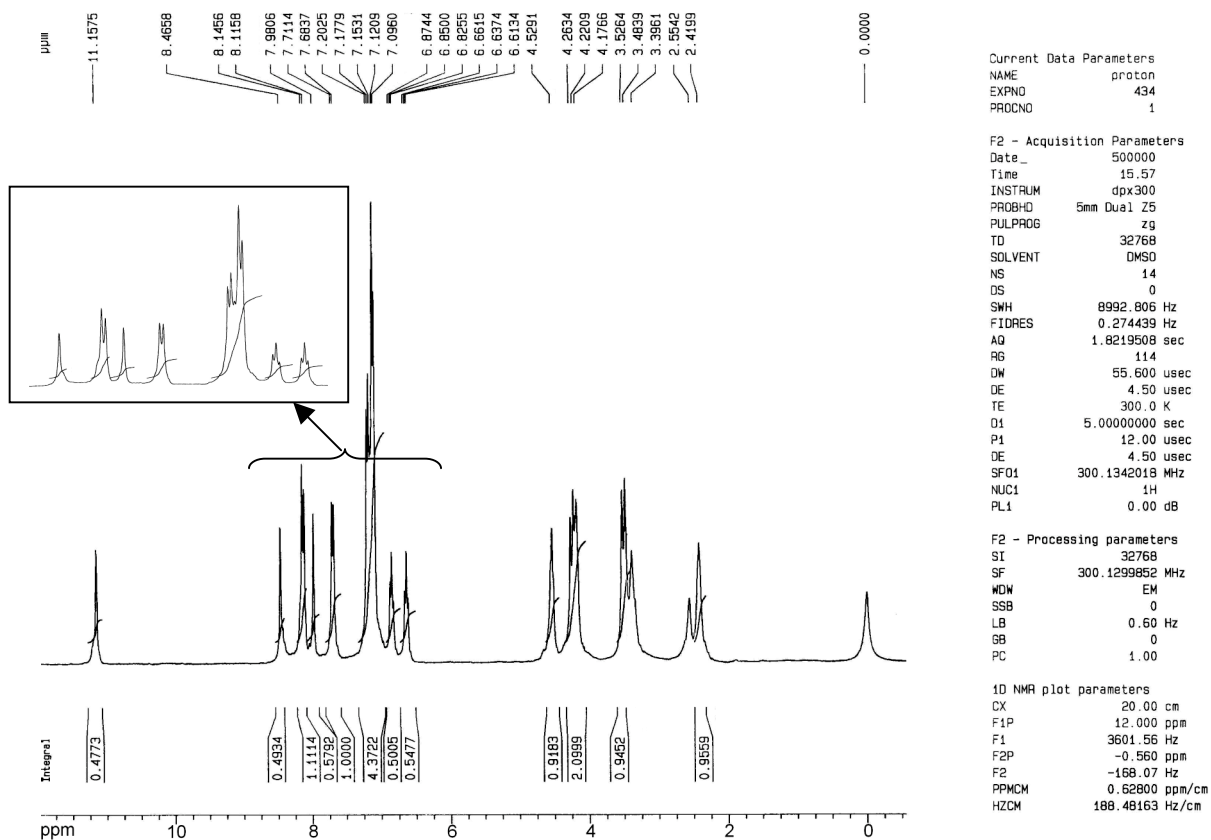

Figure S1.  $^1\text{H}$  NMR spectrum of **4b** in  $\text{DMSO-}d_6$ .

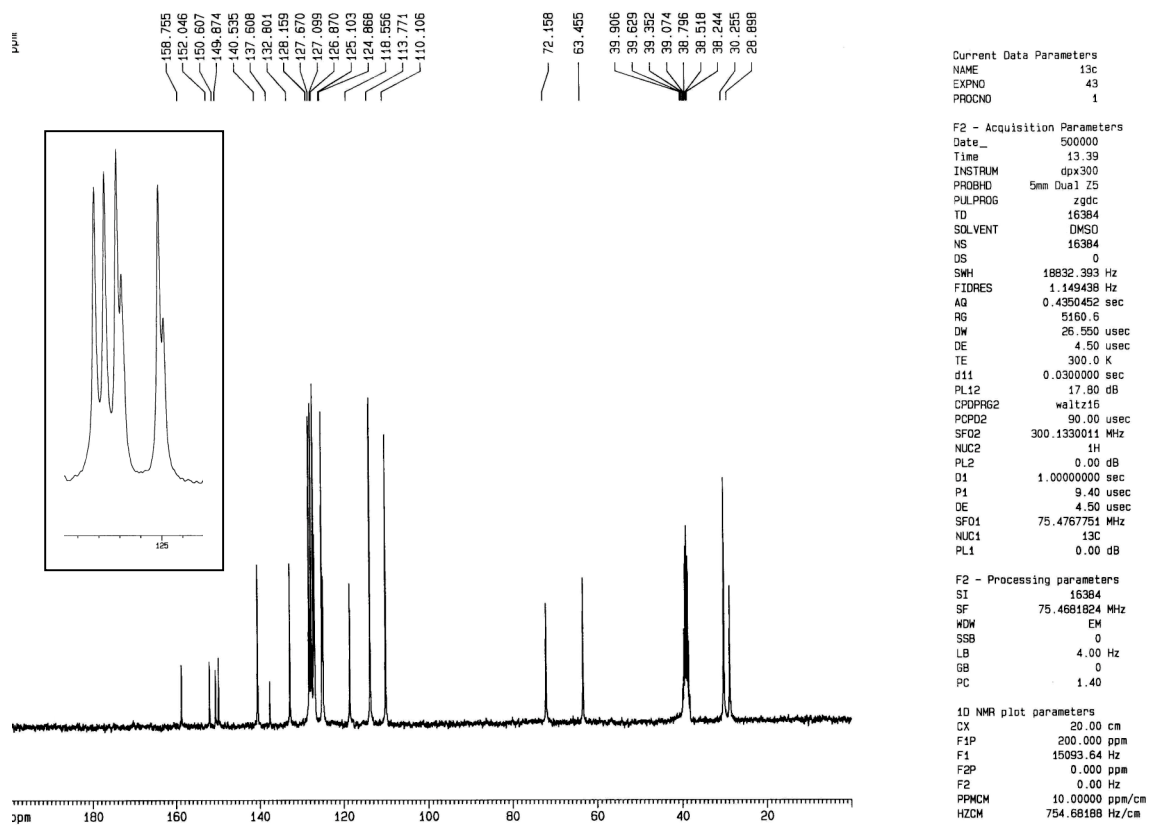

Figure S2.  $^{13}\text{C}$  NMR spectrum **4b** in  $\text{DMSO-}d_6$ .

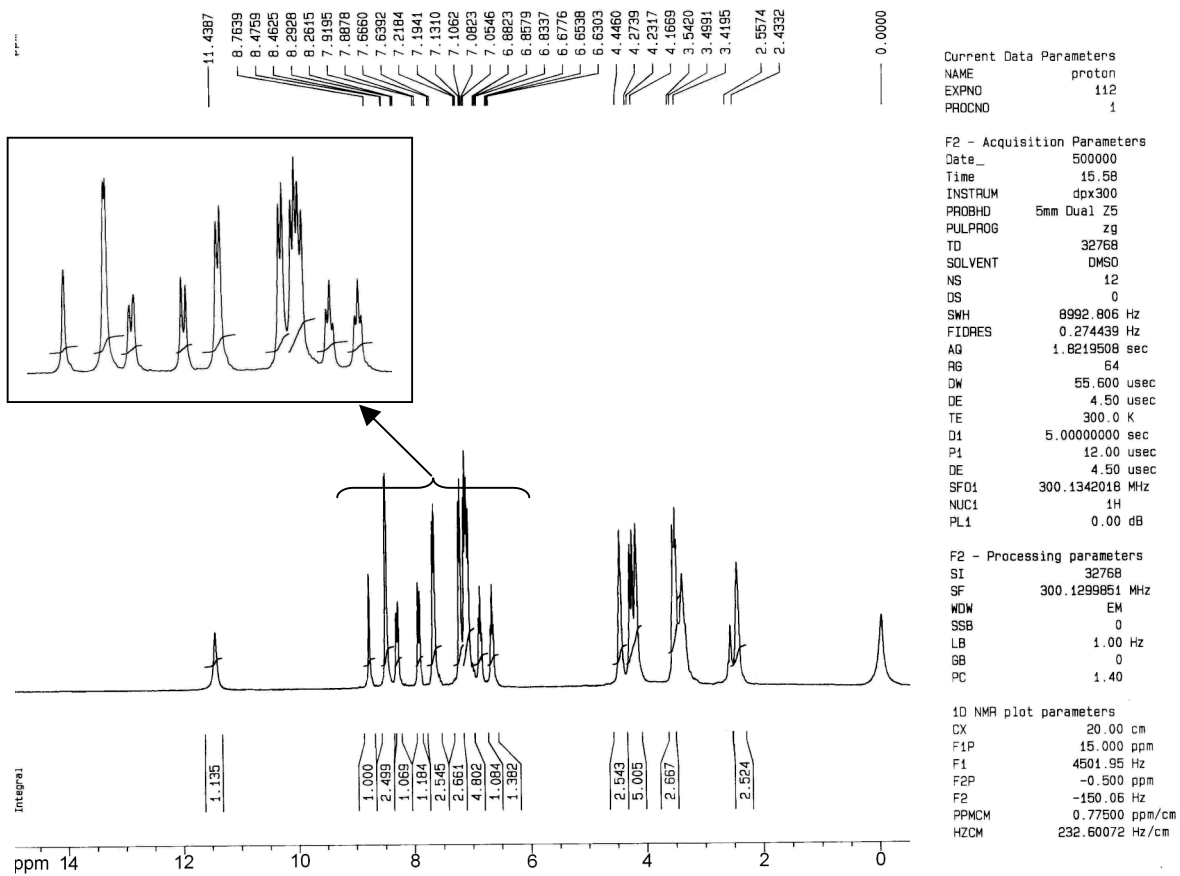

Figure S3.  $^1\text{H}$  NMR spectrum of **4c** in  $\text{DMSO-}d_6$ .

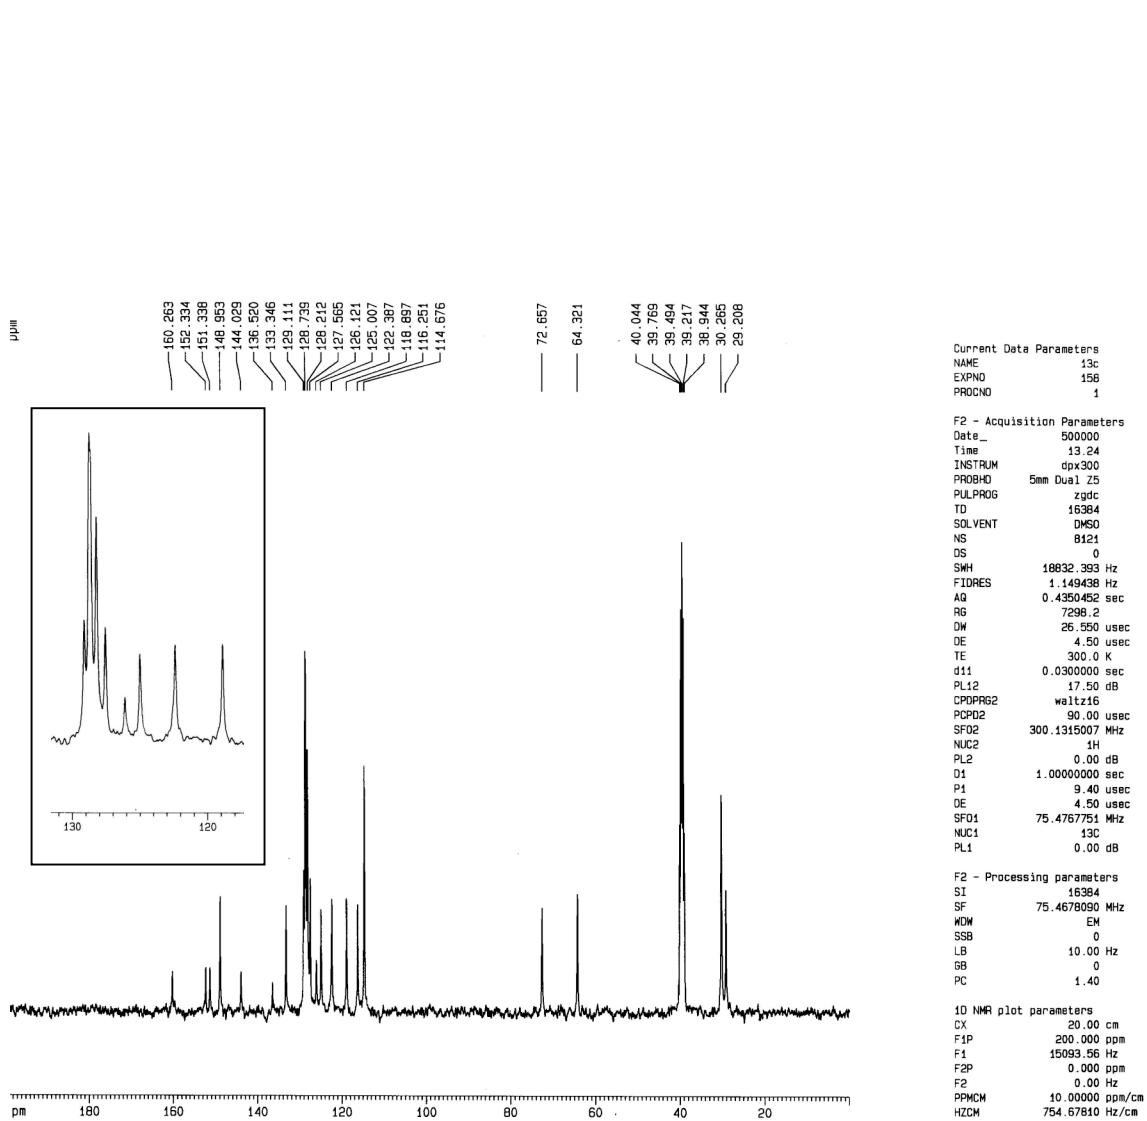

**Figure S4.**  $^{13}\text{C}$  NMR spectrum of **4c** in  $\text{DMSO-}d_6$

## $^1\text{H}$ - $^1\text{H}$ COSY spectra of **4b**

The 2D COSY correlation spectrum of **4b** (Figure S5) indicated that  $\text{H}_a$  protons are correlated with  $\text{H}_b$  protons at the *ortho*-position of the nitro group which exhibited a moderate upfield shift ( $\Delta\delta = -0.22$ ) upon addition of tetrabutylammonium fluoride ions (5.0 equiv.) as depicted in Figure S6.

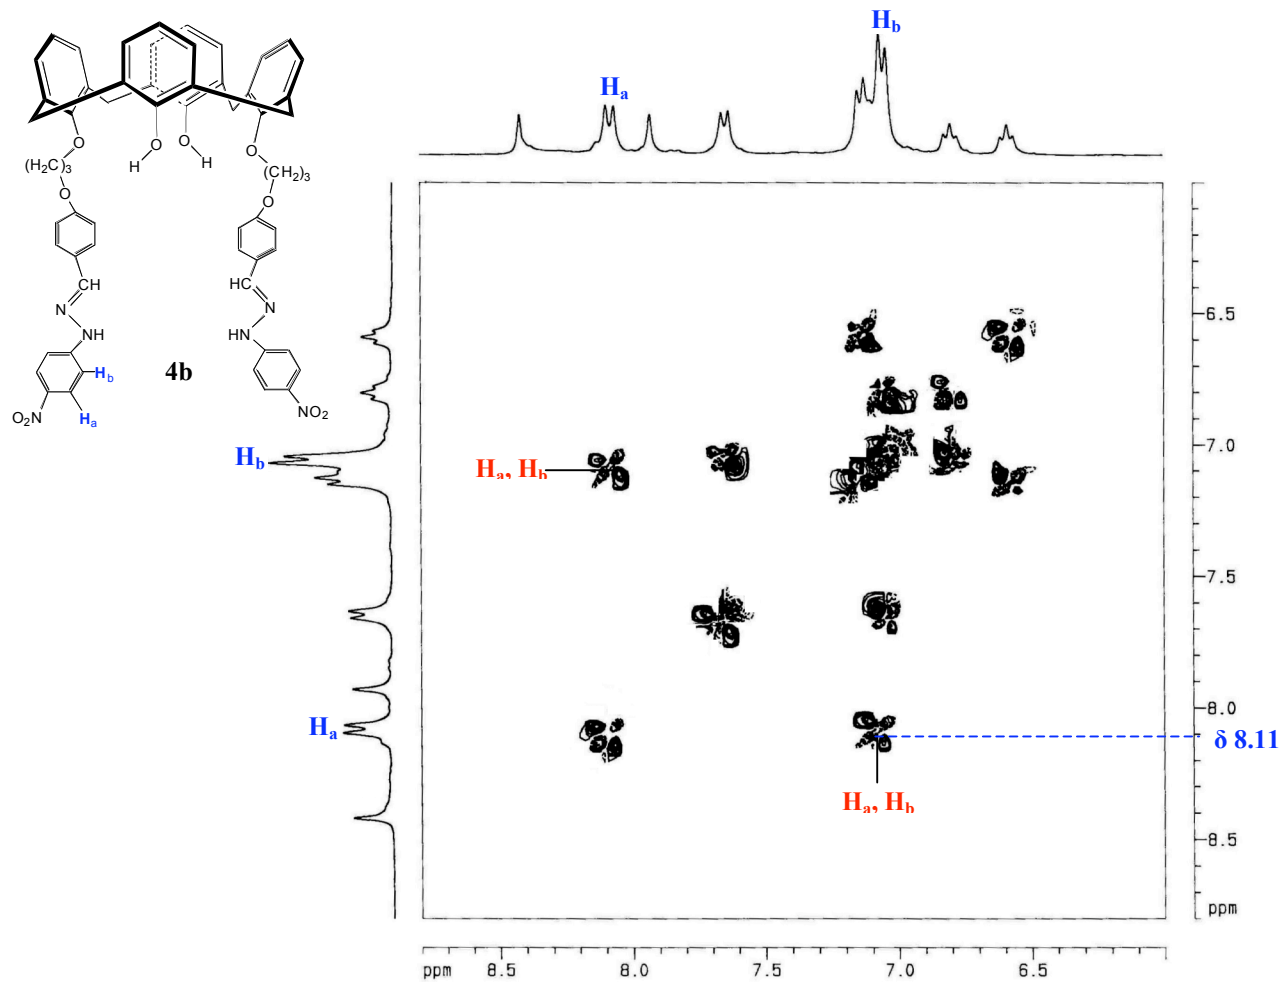

Figure S5.  $^1\text{H}$ - $^1\text{H}$  COSY spectrum of **4b** in  $\text{DMSO}-d_6$ .

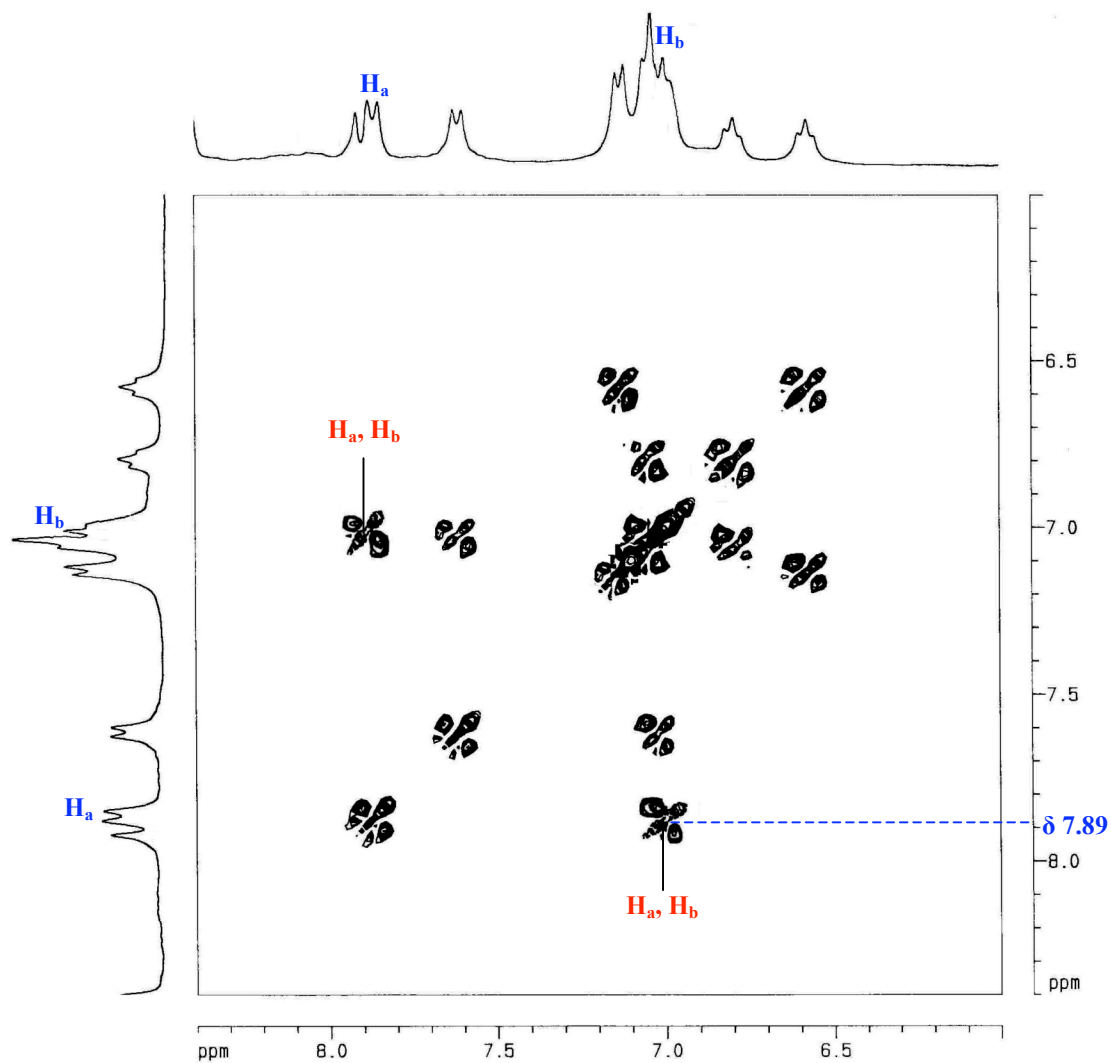

**Figure S6.**  $^1\text{H}$ - $^1\text{H}$  COSY spectrum of **4b** in  $\text{DMSO}-d_6$  in the presence of 5.0 equiv of tetrabutylammonium fluoride.

## Uv-visible spectra and absorbance titration curves

Note: The receptors **4d** and **4e** exhibited similar Uv-visible spectral changes and colorimetric observations with the examined anions as that observed for **4b** and **4c** respectively in analogous experimental set-ups.

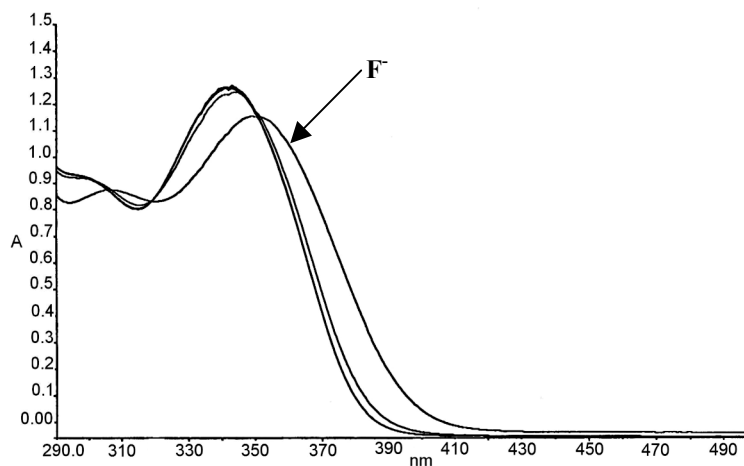

**Figure S7.** UV-visible spectra of **4a** ( $5 \times 10^{-5}$  M) with different anions ( $1 \times 10^{-4}$  M) (F<sup>-</sup>, Cl<sup>-</sup>, Br<sup>-</sup>, I<sup>-</sup>, HSO<sub>4</sub><sup>-</sup>, H<sub>2</sub>PO<sub>4</sub><sup>-</sup>, AcO<sup>-</sup>, ClO<sub>4</sub><sup>-</sup>, PF<sub>6</sub><sup>-</sup> in the form of tetrabutylammonium salts) in DMSO:CH<sub>3</sub>CN (0.5:9.5 v/v).

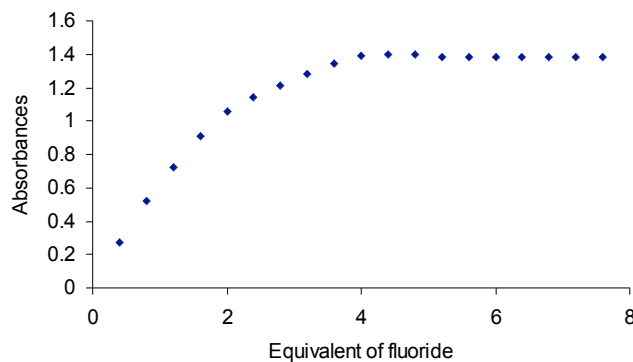

**Figure S8.** Absorbance changes for **4b** at 549 nm on addition of various equivalents of tetrabutylammonium fluoride.

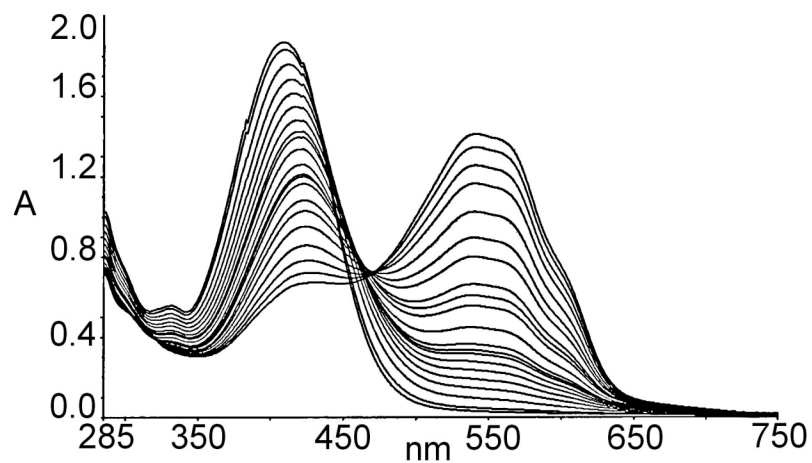

**Figure S9.** Changes in absorption spectra for **4b** ( $5 \times 10^{-5}$  M) in DMSO:CH<sub>3</sub>CN (0.5:9.5 v/v) with addition of tetrabutylammonium hydroxide from 0 to 4 equiv.

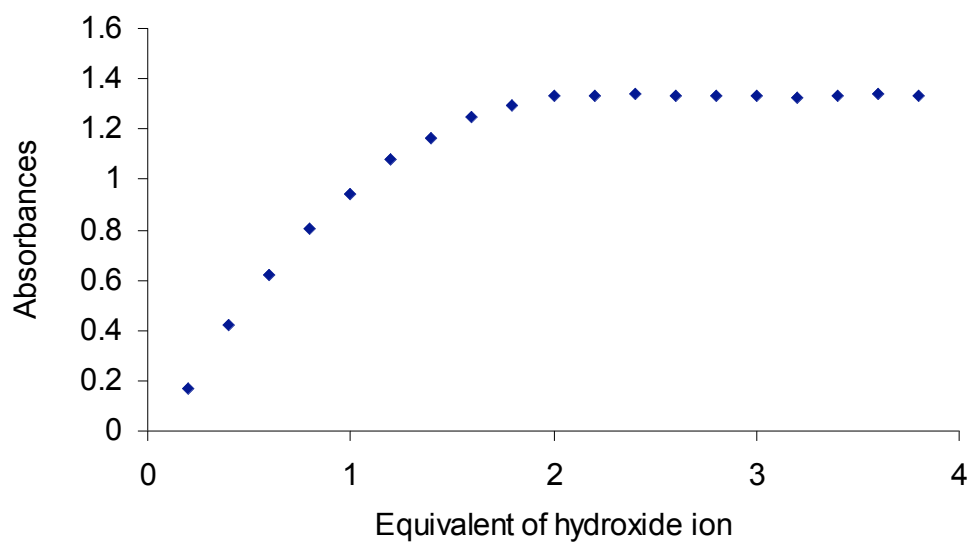

**Figure S10.** Absorbance changes for **4b** at 549 nm on addition of various equivalents of tetrabutylammonium hydroxide.



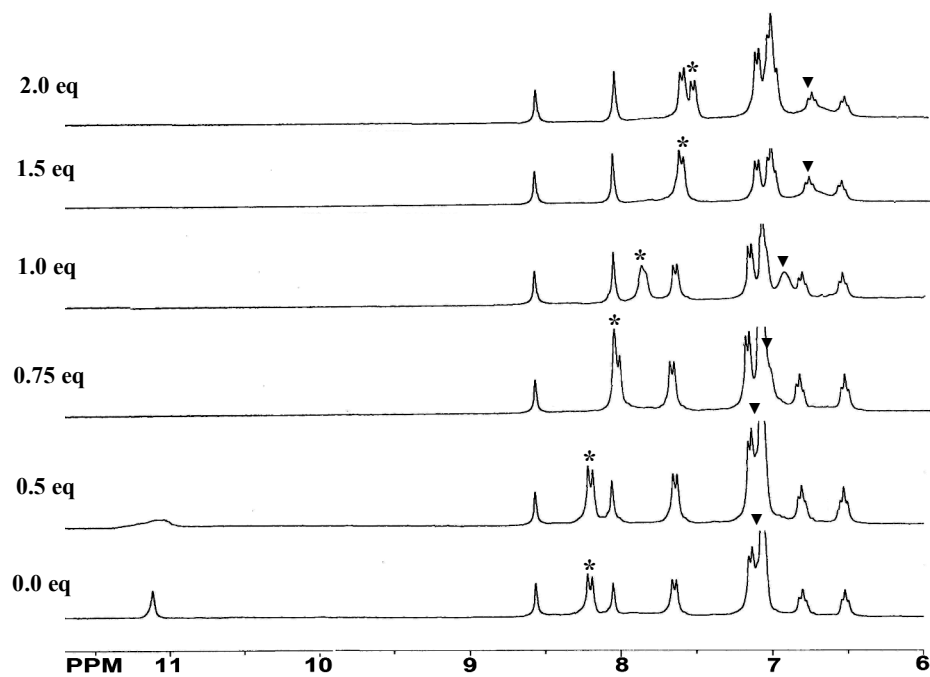

**Figure S11** Partial  $^1\text{H}$  NMR (300 MHz and 298 K) spectra of **4b** (10 mM) upon addition of various equiv. of TBA.OH (40 mM) in  $\text{DMSO-}d_6$ . Numbers at the left side indicate the equivalent amounts of  $\text{OH}^-$  added (\* =  $\text{ArH}_a$ , ▼ =  $\text{ArH}_b$ ).

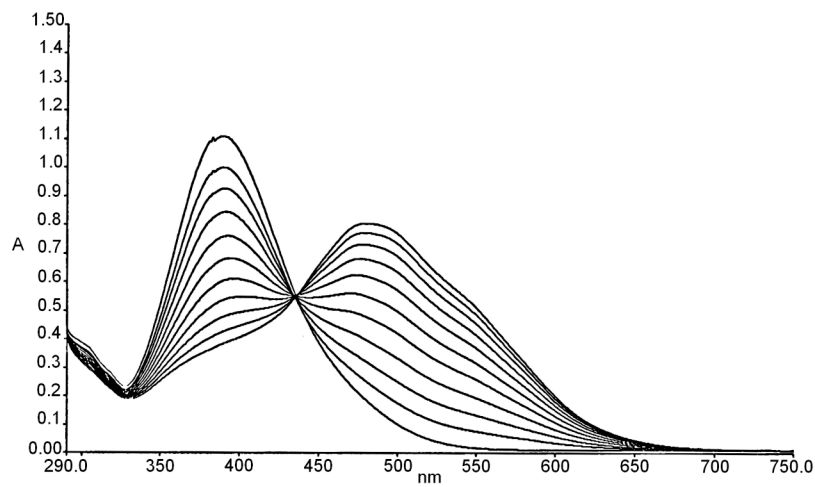

**Figure S12.** Changes in absorption spectra for **4c** ( $2 \times 10^{-5}$  M) in  $\text{DMSO:CH}_3\text{CN}$  (0.5:9.5 v/v) with addition of tetrabutylammonium fluoride from 0 to 5 equiv.

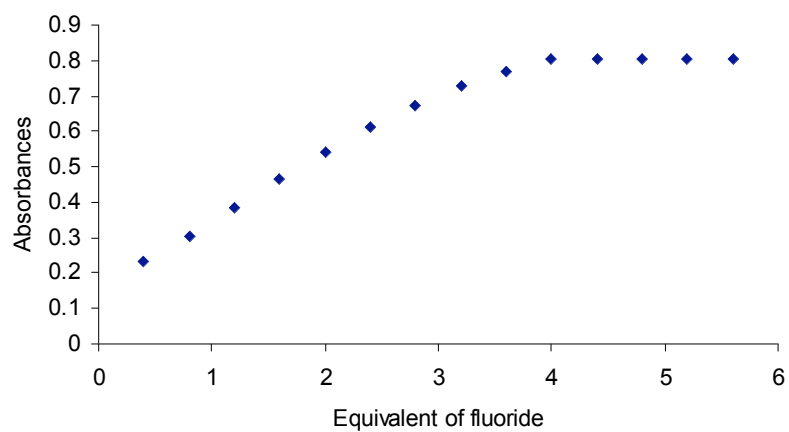

**Figure S13.** Absorbance changes for **4c** at 485 nm on addition of various equivalents of tetrabutylammonium fluoride.

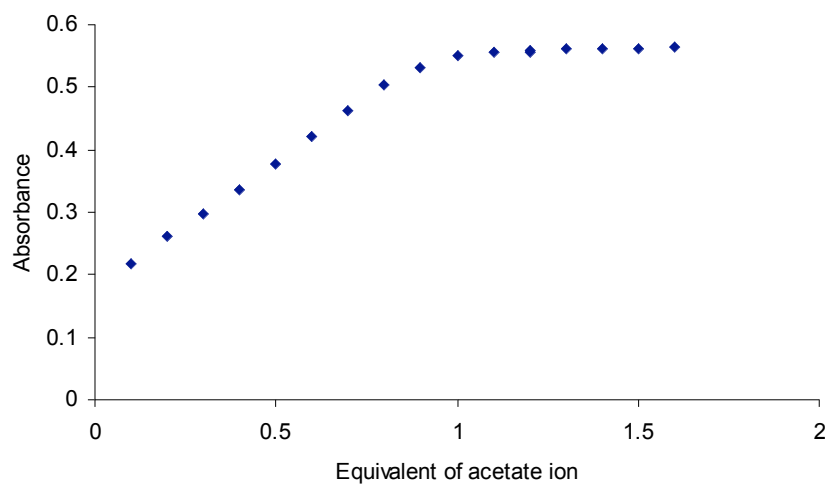

**Figure S14.** Absorbance changes for **4c** at 477 nm on addition of various equivalents of tetrabutylammonium acetate.

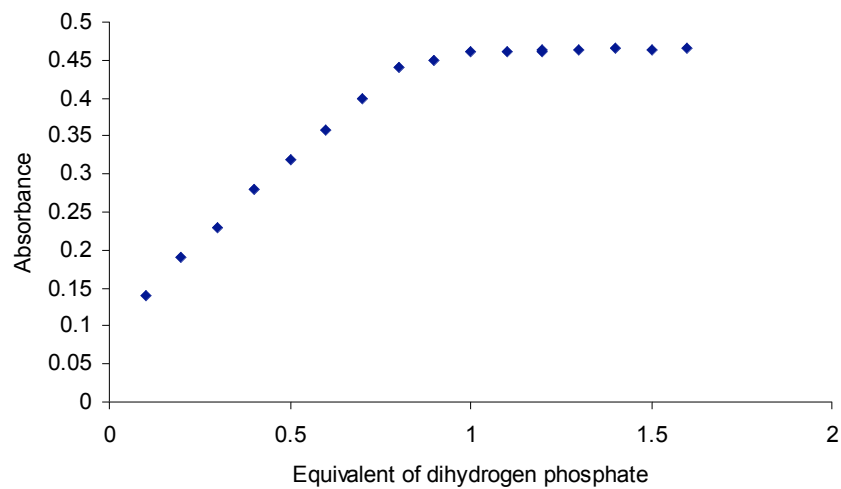

**Figure S15.** Absorbance changes for **4c** at 469 nm on addition of various equivalents of dihydrogen phosphate.

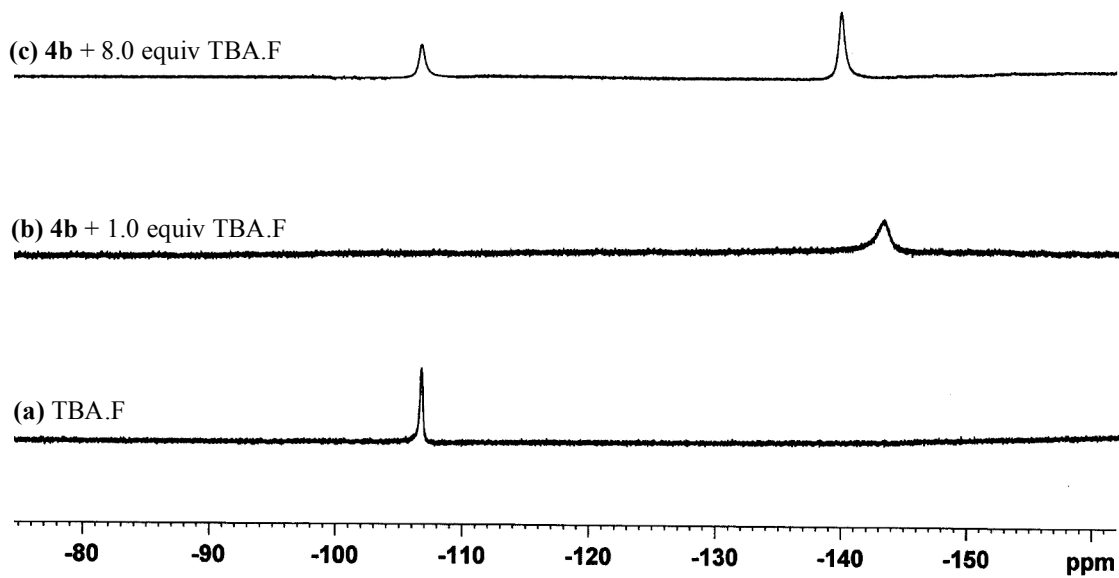

**Figure S16.** Partial  $^{19}\text{F}$  NMR (300 MHz and 298 K) spectra of **4b** (10 mM) (a) only TBA.F (b) **4b**+1.0 eq TBA.F (c) **4b**+8.0 equiv TBA.F
